# Supplementary material for: Treatment of hypertension by increasing impaired endothelial TRPV4‐KCa2.3 interaction
Source: PubMed Central journal article supplement (PMC5666316; doi:10.15252/emmm.201707725), 2017-09-12
Supplement: EMMM-9-1491-s001.pdf [file EMMM-9-1491-s001.pdf]

## Treatment of hypertension by increasing impaired endothelial TRPV4-KCa2.3 interaction

**Authors:** Dongxu He<sup>1,‡</sup>, Qiongxi Pan<sup>1,‡</sup>, Zhen Chen<sup>1,‡</sup>, Chunyuan Sun<sup>1,‡</sup>, Peng Zhang<sup>1</sup>, Aiqin Mao<sup>1</sup>, Yaodan Zhu<sup>1</sup>, Hongjuan Li<sup>1</sup>, Chunxiao Lu<sup>1</sup>, Mingxu Xie<sup>1</sup>, Yin Zhou<sup>1</sup>, Daoming Shen<sup>1</sup>, Chunlei Tang<sup>1</sup>, Zhenyu Yang<sup>2</sup>, Jian Jin<sup>1</sup>, Xiaoqiang Yao<sup>3</sup>, Bernd Nilius<sup>4</sup>, Xin Ma<sup>1,\*</sup>

### APPENDIX

#### Table of contents

**Appendix Fig S1.** Specificity of anti-TRPV4, anti-KCa2.3 and anti-flag antibodies.

**Appendix Fig S2.** Co-Immunoprecipitation (co-IP) of TRPV4, KCa2.3 and caveolin-1 in ECs.

**Appendix Fig S3.** Patch clamp recording GSK1016790A or CyPPA-stimulated whole cell current.

**Appendix Fig S4.** EDHF is the dominant component of vasodilation in small arteries.

**Appendix Fig S5.** Effect of TRPV4 mutation on cellular localization and function of the channel

**Appendix Fig S6.** Effect of KCa2.3 mutation on cellular localization and function of the channel.

**Appendix Fig S7.** Interactions between caveolin-1, TRPV4, and KCa2.3 in ECs.

**Appendix Fig S8.** Effect of M $\beta$ CD on TRPV4-KCa2.3 interaction.

**Appendix Fig S9.** The proposed binding sites for JNc-440 to TRPV4 and KCa2.3.

**Appendix Fig S10.** Protective effect of JNc-440.

**Appendix Fig S11.** JNc-440 has no effect on either (A) TRPV4 or (B) KCa2.3 channel activity.

**Appendix Table S1.** Baseline characteristics of Normotensive Control subjects and Hypertensive Patients

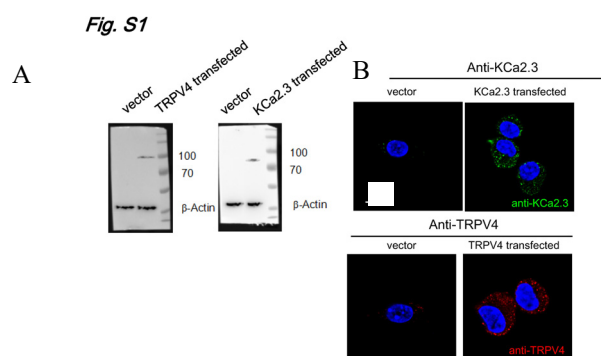

**Fig S1** Specificity of anti-TRPV4, anti-K and anti-flag antibodies. TRPV4 or KCa2.3 plasmids were transiently transfected into HEK293 cells, and specificity was validated by western blotting (A) and immunostaining (B). Scale bars, 10  $\mu$ m.

**Fig. S2**

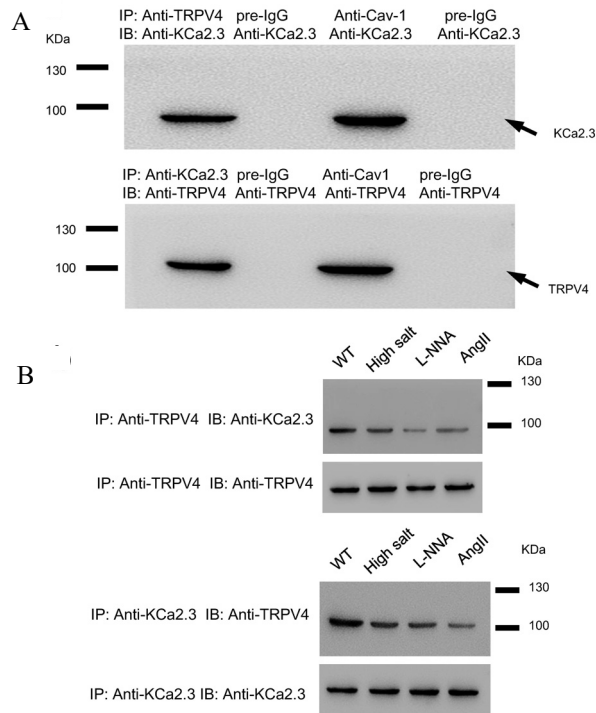

**Fig S2** Co-Immunoprecipitation (co-IP) of TRPV4, KCa2.3 and caveolin-1 in ECs. In normotensive mice (A) or mice treated with a high-salt diet, L-NNA, or AngII (B), colocalization of caveolin-1, TRPV4-KCa2.3 interaction was studied by Co-IP.

**Fig. S3**

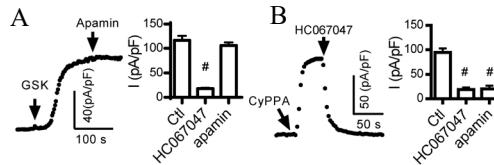

**Fig S3** Patch clamp recording of GSK1016790A or CyPPA-stimulated whole cell current at  $\pm 80$  mV. (A) Effect of apamin on GSK1016790A-stimulated current in primarily cultured mice ECs. (B) Effect of HC067047 on CyPPA-stimulated current in primarily cultured mice ECs. Representative traces (left) and summary of data (right) were shown. Data are shown in mean  $\pm$  SD. #,  $P < 0.0001$  compared to control by one way ANOVA.

**Fig. S4**

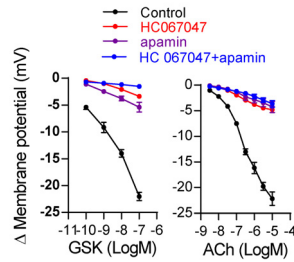

**Fig. S4** EDHF is the dominant component of vasodilation in small arteries. **(a)** Effect of apamin and HC067047 on GSK1016790A or ACh -induced hyperpolarization of smooth muscle in isolated mesenteric artery strips. Membrane potentials were measured by sharp microelectrodes impaled from adventitial side. Left: GSK1016790A (GSK, 0.1 nM-0.1  $\mu$ M). Right: ACh (3 nM-10  $\mu$ M). Arterial strips were pretreated with HC067047 (10  $\mu$ M) or apamin (200 nM) or together for 30 min. Data in mean  $\pm$  SD.

**Fig. S5**

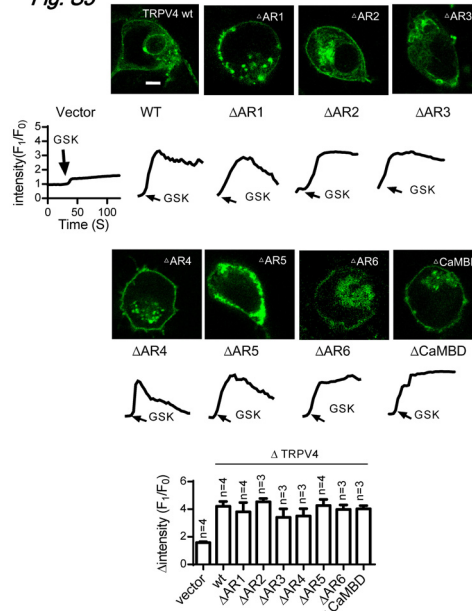

**Fig. S5** Effect of TRPV4 mutation on cellular localization and function of the channel. Locations of the channels were analyzed using confocal images, and their function was validated by measurements of Ca<sup>2+</sup> influx (curves below and summary in the bottom) in response to stimulation with GSK1016790A (GSK), a specific TRPV4 agonist. Scale bars, 5  $\mu$ m. Data are the mean  $\pm$  SD.

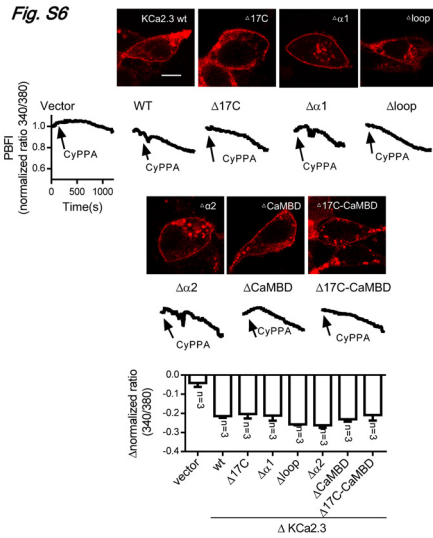

**Fig. S6** Effect of KCa2.3 mutation on cellular localization and function of the channel. Locations of the channels were analyzed using confocal images, and their function was validated by measurements of  $K^+$  efflux (curves below and summary in the bottom) in response to stimulation with CyPPA, a specific KCa2.3 agonist. Scale bars, 10  $\mu\text{m}$ . Data are the mean  $\pm$  SD. Scale bar, 10  $\mu\text{m}$ ,

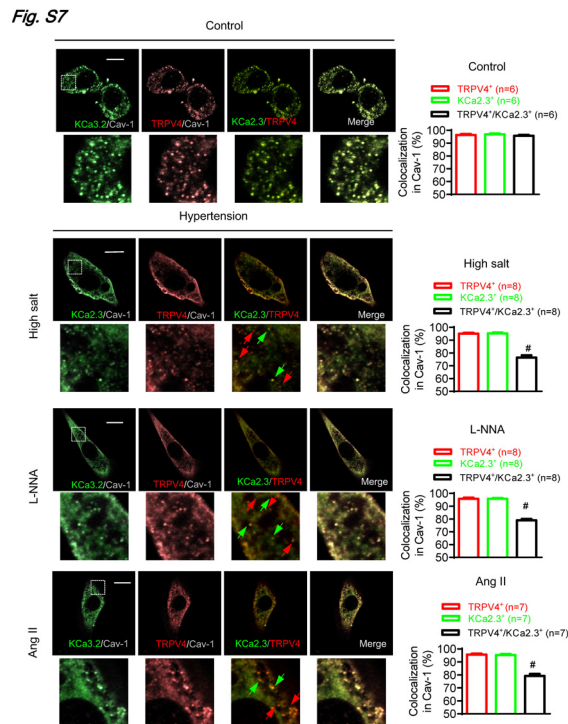

**Fig. S7** Interactions between caveolin-1, TRPV4, and KCa2.3 in ECs. In mice treated with a high-salt diet, L-NNA, or AngII, although TRPV4 and KCa2.3 still individually colocalized with caveolin-1, TRPV4-KCa2.3 interaction was reduced compared with in the controls. Representative images and summary data of TRPV4<sup>+</sup>, KCa2.3<sup>+</sup>, and TRPV4<sup>+</sup>/KCa2.3<sup>+</sup> Cav-1<sup>+</sup> signals in ECs from mice treated with a high-salt diet, L-NNA or AngII. Red arrows, TRPV4 signal separated from the Cav-1<sup>+</sup> signal; Green arrows, KCa2.3 signal separated from the Cav-1<sup>+</sup> signal. Scale bar, 10  $\mu\text{m}$ . Data are the mean  $\pm$





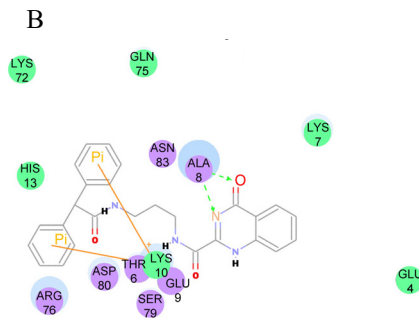

**Fig. S9** The proposed binding sites for JNc-440 to TRPV4 and KCa2.3. **(A)** The amino acid residues THR181, PHE226, PHE185, and CHR193 in the TRPV4 molecule were the main sites of interaction between JNc-440 and TRPV4. An amide group in JNc-440 formed a hydrogen bond with PHE185, a carbonyl group formed a hydrogen bond with THR181, and a phenyl group had a Pi interaction with PHE 226; the aromatic rings were buried in the inner hydrophobic pocket. **(B)** The amino acid residues ALA8, THR6, and LYS10 in KCa2.3 were the main sites of interaction between JNc-440 and KCa2.3. Carbonyl and imine groups in JNc-440 formed hydrogen bonds with ALA8, and a diphenyl group had a Pi interaction with THR6 and LYS10, stabilizing the conformation.

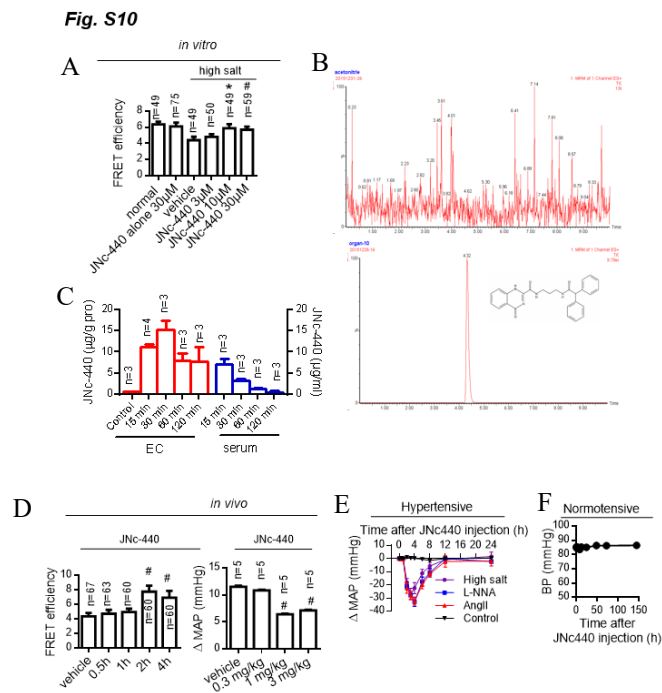

**Fig. S10** Protective effect of JNc-440. **(A)** In primary cultured ECs in a high-salt medium, JNc-440 protected TRPV4-KCa2.3 interaction in a dose-dependent manner. \*,  $p=0.00264$ , #,  $p=0.0195$  v.s. vehicle by one way ANOVA **(B)** Chromatograms for JNc-440 in plasma samples. Upper panel, blank plasma; Lower panel, blank plasma spiked with JNc-440. **(C)** Concentration of JNc-440 in ECs and serum. JNc-440 (10 mg/kg) was intravenously injected and measured at 15, 30, 60 and 120, min after dosing ( $n = 5$ ;  $\mu\text{g}/\text{mL}$  for serum;  $\mu\text{g}/\text{g}$  for the ECs). **(D)** In mice on a high-salt diet, 1mg/kg JNc-440 protected TRPV4-KCa2.3 interaction in isolated arterial ECs after 2 h after tail injection (left), and had an antihypertensive effect after one week after tail injection (right). #,  $p < 0.0001$  v.s. vehicle by one way

ANOVA. (E-F) Time-course of acute blood pressure measurement in high-salt, L-NNA, AngII-treated mice (E) and control (F) after tail injection of 1 mg/kg JNc440. Data are the mean  $\pm$  SD. # $p < 0.05$  compared to vehicle.

**Fig. S11**

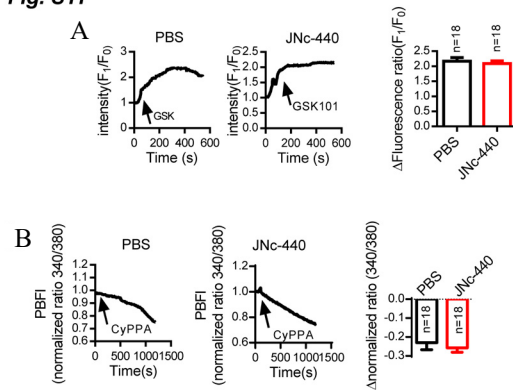

**Fig. S11** JNc-440 has no effect on either (A) TRPV4 or (B) KCa2.3 channel activity. JNc-440 was intravenously injected at 1 mg/kg in normotensive mice, and arterial ECs were isolated. TRPV4 channel function was validated by measuring Ca<sup>2+</sup> influx with GSK1016790A (GSK). KCa2.3 channel function was validated by measuring K<sup>+</sup> efflux with CyPPA.

## Appendix tables

Table S1 Baseline characteristics of Normotensive Control subjects and Hypertensive Patients

| Parameter                                    | Normotensive Controls (n=21) | Hypertensive Patients (n=15) |
|----------------------------------------------|------------------------------|------------------------------|
| Gender (M/F)                                 | 10/11                        | 8/7                          |
| Age (years)                                  | 43.3±9.4                     | 51.3±10.7                    |
| Systolic blood pressure (mm Hg)              | 110±8                        | 161±25                       |
| Diastolic blood pressure (mm Hg)             | 67±8                         | 101±17                       |
| Heart rate (bpm)                             | 70±8                         | 75±11                        |
| Diabetes (%)                                 | 2 (9.5)                      | 7 (46.7)                     |
| Hyperlipemia (%)                             | 4 (19.0)                     | 10 (66.7)                    |
| Atherosclerosis (%)                          | 3 (14.3)                     | 9 (40.0)                     |
| Anti-hypertensive drugs (%)                  | 0 (0.0)                      | 10 (66.7)                    |
| Femoral artery OD (0.90~1.65 mm)*            | 9 (42.9)                     | 6 (40.0)                     |
| Popliteal artery OD (0.68~1.30 mm)           | 4 (19.0)                     | 3 (20.0)                     |
| Superior Mesenteric artery OD (0.75~1.25 mm) | 2 (9.5)                      | 1 (6.7)                      |
| Brachial artery OD (0.72~1.45mm)             | 2 (9.5)                      | 2 (13.3)                     |
| Carotid artery OD (0.58~0.96 mm)             | 4 (19.0)                     | 3 (40.0)                     |

\*OD, outer diameter
